# Supplementary material for: Preparation of hydrophilic and antifouling coatings via tannic acid and zwitterionic polymers
Source: Royal Society of Chemistry journal article supplement (doi:10.1039/d5ra00643k), 2025-01-01
Supplement: d5ra00643k1.pdf [file d5ra00643k1.pdf]

## Supporting Information

### **Preparation of the hydrophilic and antifouling coatings via tannic acid and zwitterionic polymers**

Aosheng Zhong<sup>a</sup>, Ruixiang Tao<sup>b</sup>, Ran Zong<sup>a</sup>, Shuangyi Liu<sup>a</sup>, Baoqing Shentu<sup>a\*</sup>

<sup>a</sup> State Key Laboratory of Chemical Engineering, College of Chemical and Biological Engineering, Zhejiang University, Hangzhou, 310058, China.

<sup>b</sup> Zhejiang CHINT Cable Co., Ltd., Jiaxing 314006, China

E-mail: shentu @zju.edu. cn

## EDS analysis

**Table S1** The raw data of surface elemental compositions for PEI-g-SBMA<sub>x</sub>/TA-Fe<sup>3+</sup>/PET by EDS analysis.

|                                                     | Element | wt (%) | wt (%) Sigma | Atom ratio (%) |
|-----------------------------------------------------|---------|--------|--------------|----------------|
| PET                                                 | C       | 61.14  | 0.56         | 67.74          |
|                                                     | O       | 38.86  | 0.56         | 32.26          |
|                                                     | Total   | 100.00 |              | 100.00         |
| PEI-g-SBMA <sub>12%</sub> /TA-Fe <sup>3+</sup> /PET | C       | 51.71  | 0.82         | 60.38          |
|                                                     | O       | 38.44  | 0.62         | 33.70          |
|                                                     | Fe      | 5.04   | 0.09         | 1.26           |
|                                                     | N       | 4.54   | 0.99         | 4.54           |
|                                                     | S       | 0.27   | 0.04         | 0.12           |
|                                                     | Total   | 100.00 |              | 100.00         |
| PEI-g-SBMA <sub>22%</sub> /TA-Fe <sup>3+</sup> /PET | C       | 50.75  | 0.82         | 59.31          |
|                                                     | O       | 39.46  | 0.62         | 34.62          |
|                                                     | Fe      | 4.72   | 0.09         | 1.19           |
|                                                     | N       | 4.71   | 0.99         | 4.72           |
|                                                     | S       | 0.36   | 0.04         | 0.16           |
|                                                     | Total   | 100.00 |              | 100.00         |
| PEI-g-SBMA <sub>40%</sub> /TA-Fe <sup>3+</sup> /PET | C       | 50.75  | 0.82         | 59.31          |
|                                                     | O       | 39.46  | 0.62         | 34.62          |
|                                                     | Fe      | 4.72   | 0.09         | 1.19           |
|                                                     | N       | 4.71   | 0.99         | 4.72           |
|                                                     | S       | 0.36   | 0.04         | 0.16           |
|                                                     | Total   | 100.00 |              | 100.00         |

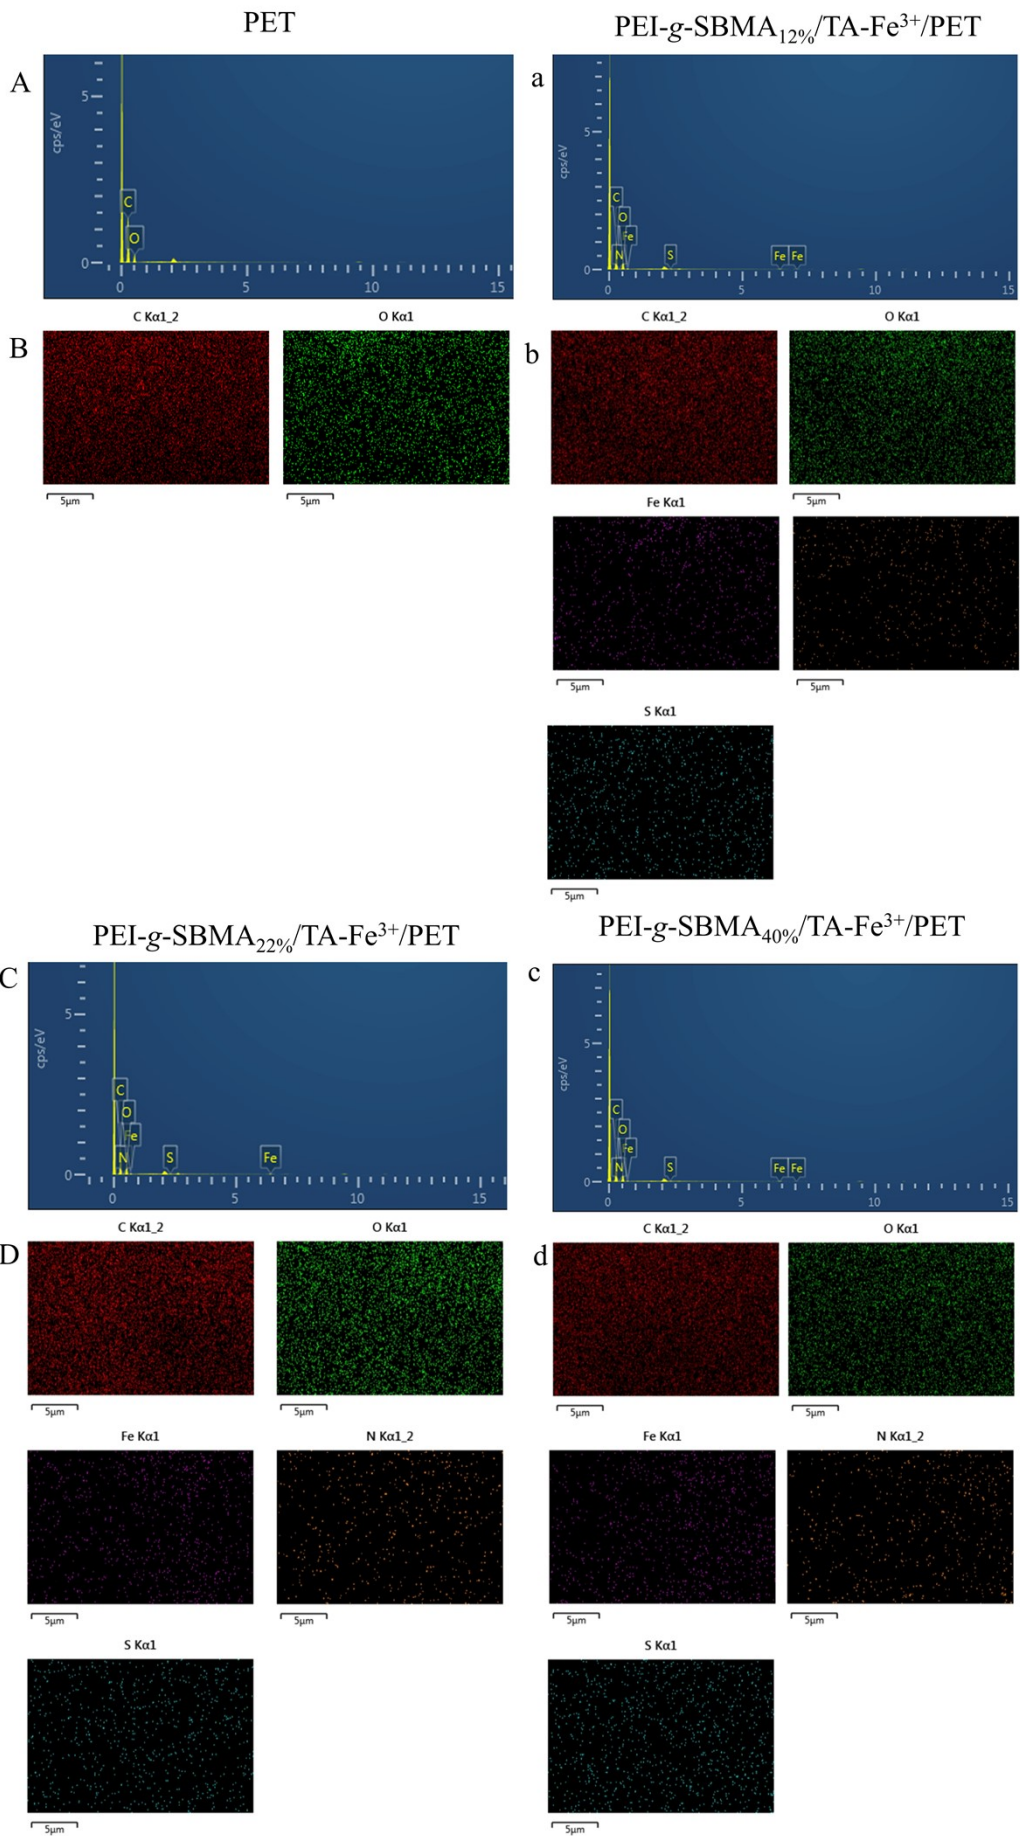

**Fig. S1** Element image (A) (a) (C) (c); element surface distribution image (B) (b) (D) (d) obtained by EDS scanning of PET, PEI-g-SBMA<sub>12%</sub>/TA-Fe<sup>3+</sup>/PET, PEI-g-SBMA<sub>22%</sub>/TA-Fe<sup>3+</sup>/PET, PEI-g-SBMA<sub>40%</sub>/TA-Fe<sup>3+</sup>/PET.
